# Supplementary material for: Highly efficient CNT functionalized cotton fabrics for flexible/wearable heating applications
Source: Royal Society of Chemistry journal article supplement (doi:10.1039/c4ra10667a), 2015-01-01
Supplement: c4ra10667a1.pdf [file c4ra10667a1.pdf]

## Supplementary Informations

### Highly efficient CNT functionalized cotton fabrics for flexible/wearable heating applications

P. Ilanchezhiyan<sup>\*a</sup>, A. S. Zakirov<sup>a</sup>, G.Mohan Kumar <sup>a</sup>, Sh.U. Yuldashev<sup>a</sup>, H.D.Cho<sup>a</sup>,  
T. W.Kang<sup>\*a</sup>, A.T. Mamadalimov<sup>b</sup>

<sup>a</sup>Quantum - Functional Semiconductor Research Center, Dongguk University, Seoul 100715,  
Republic of Korea.

<sup>b</sup>Department of Physics, National University of Uzbekistan, Tashkent 100175, Uzbekistan.

#### Corresponding Author

\*Email: [ilancheziyan@dongguk.edu](mailto:ilancheziyan@dongguk.edu), [twkang@dongguk.edu](mailto:twkang@dongguk.edu).

Phone: +82-2-2260-3205; Fax: +82-2-2278-4519

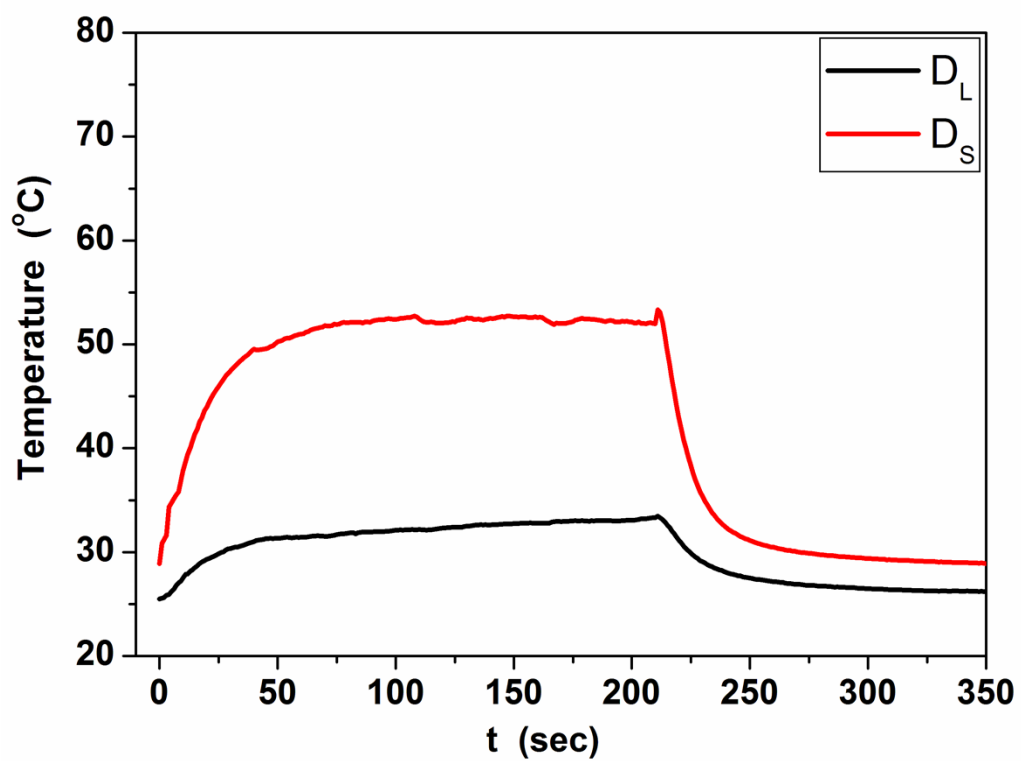

**Figure S1** Time-dependent temperature profiles of CNT functionalized cotton heaters with respect to the surface resistivity of the CNT.
